# Supplementary material for: Complex Physical Structure of Complete Mitochondrial Genome of Quercus acutissima (Fagaceae): A Significant Energy Plant
Source: MDPI journal article supplement (doi:10.3390/genes13081321), 2022-07-24
Supplement: s1 [file s1]

**Table S1.** Gene composition in the *Q. acutissima* mitogenome.

| Group of genes                   | Name of genes                                                                                                                                                                        |
|----------------------------------|--------------------------------------------------------------------------------------------------------------------------------------------------------------------------------------|
| ATP synthase                     | <i>atp1, atp4, atp6, atp8, atp9</i>                                                                                                                                                  |
| NADH dehydrogenase               | <i>nad1, nad2, nad3, nad4, nad4L, nad5, nad6, nad7, nad9</i>                                                                                                                         |
| Cytochrome c biogenesis          | <i>cob</i>                                                                                                                                                                           |
| Ubiquinol cytochrome c reductase | <i>ccmB, ccmC, ccmFC, ccmFN</i>                                                                                                                                                      |
| Cytochrome c oxidase             | <i>cox1, cox2, cox3</i>                                                                                                                                                              |
| Maturases                        | <i>matR</i>                                                                                                                                                                          |
| Transport membrane protein       | <i>mttB</i>                                                                                                                                                                          |
| Large subunit of ribosome        | <i>rpl10, rpl2, rpl5</i>                                                                                                                                                             |
| Small subunit of ribosome        | <i>rps10, rps12, rps3, rps4</i>                                                                                                                                                      |
| Succinate dehydrogenase          | <i>sdh3</i>                                                                                                                                                                          |
| Ribosome RNA                     | <i>rrn18, rrn26, rrn5</i>                                                                                                                                                            |
| Transfer RNA                     | <i>trnC-GCA, trnD-GUC, trnE-UUC (×2), trnF-GAA, trnG-GCC, trnH-GUG, trnK-UUU, trnM-CAU (×3), trnN-GUU, trnP-UGG (×2), trnQ-UUG, trnS-GCU, trnS-UGA, trnV-GAC, trnW-CCA, trnY-GUA</i> |

**Table S2.** RSCU for each amino acid pair in the *Q. acutissima* mitogenome.

| Amino | Codon 1<br>RSCU | Codon 2<br>RSCU | Codon 3<br>RSCU | Codon 4<br>RSCU | Codon 5<br>RSCU | Codon 6<br>RSCU |
|-------|-----------------|-----------------|-----------------|-----------------|-----------------|-----------------|
| Ala   | GCU<br>1.601    | GCA<br>0.984    | GCC<br>0.903    | GCG<br>0.511    |                 |                 |
| Arg   | AGA<br>1.443    | CGA<br>1.28     | CGU<br>1.171    | CGG<br>0.781    | AGG<br>0.717    | CGC<br>0.608    |
| Asn   | AAU<br>1.337    | AAC<br>0.663    |                 |                 |                 |                 |
| Asp   | GAU<br>1.358    | GAC<br>0.642    |                 |                 |                 |                 |
| Cys   | UGU<br>1.169    | UGC<br>0.831    |                 |                 |                 |                 |
| End   | UAA<br>1.406    | UGA<br>1.031    | UAG<br>0.563    |                 |                 |                 |
| Gln   | CAA<br>1.488    | CAG<br>0.512    |                 |                 |                 |                 |
| Glu   | GAA<br>1.402    | GAG<br>0.598    |                 |                 |                 |                 |
| Gly   | GGA<br>1.42     | GGU<br>1.27     | GGG<br>0.759    | GGC<br>0.552    |                 |                 |
| His   | CAU<br>1.508    | CAC<br>0.492    |                 |                 |                 |                 |
| Ile   | AUU<br>1.508    | AUC<br>0.492    | AUA<br>0.508    |                 |                 |                 |

|     |       |       |       |       |       |       |
|-----|-------|-------|-------|-------|-------|-------|
|     | 1.309 | 0.857 | 0.834 |       |       |       |
| Leu | UUA   | CUU   | UUG   | CUA   | CUC   | CUG   |
|     | 1.462 | 1.234 | 1.168 | 0.929 | 0.639 | 0.567 |
| Lys | AAA   | AAG   |       |       |       |       |
|     | 1.184 | 0.816 |       |       |       |       |
| Met | AUG   |       |       |       |       |       |
|     | 1.000 |       |       |       |       |       |
| Phe | UUU   | UUC   |       |       |       |       |
|     | 1.139 | 0.861 |       |       |       |       |
| Pro | CCU   | CCA   | CCC   | CCG   |       |       |
|     | 1.43  | 1.154 | 0.8   | 0.616 |       |       |
| Ser | UCU   | UCA   | AGU   | UCC   | UCG   | AGC   |
|     | 1.355 | 1.123 | 1.039 | 1.019 | 0.819 | 0.645 |
| Thr | ACU   | ACA   | ACC   | ACG   |       |       |
|     | 1.366 | 1.025 | 1.025 | 0.584 |       |       |
| Trp | UGG   |       |       |       |       |       |
|     | 1.000 |       |       |       |       |       |
| Tyr | UAU   | UAC   |       |       |       |       |
|     | 1.521 | 0.479 |       |       |       |       |
| Val | GUU   | GUA   | GUG   | GUC   |       |       |
|     | 1.211 | 1.179 | 0.837 | 0.773 |       |       |

---
